# Supplementary material for: Development of a portable electrochemical loop mediated isothermal amplification (LAMP) device for detection of hepatitis B virus
Source: PubMed Central journal article supplement — RSC Adv. 2018 Oct 12;8(61):34954–9. doi: 10.1039/c8ra07235c (PMC9087361; doi:10.1039/c8ra07235c), 2018-10-12
Supplement: RA-008-C8RA07235C-s001.pdf [file RA-008-C8RA07235C-s001.pdf]

## Supplemental Information

### Development of a portable electrochemical loop mediated isothermal amplification (LAMP) device for detection of hepatitis B virus

Nileththi Yasendra Jayanath<sup>a</sup>, Loc Thai Nguyen,<sup>\*b</sup> Thu Thi Vu<sup>cd</sup> and Lam Dai Tran<sup>de</sup>

<sup>a</sup>Department of Food Science & Technology, Faculty of Agriculture, University of Peradeniya, Sri Lanka.

<sup>b</sup>Food Engineering and Bioprocess Technology, School of Environment, Resources and Development (SERD),  
Asian Institute of Technology, PO Box 4, Klong Luang 12120, Pathumthani, Bangkok, Thailand.

<sup>c</sup>University of Science and Technology of Hanoi (USTH), Vietnam Academy of Science and Technology (VAST),  
18 Hoang Quoc Viet, Cau Giay, Hanoi, Vietnam.

<sup>d</sup>Center for High Technology Development (HTD), Vietnam Academy of Science and Technology (VAST), 18  
Hoang Quoc Viet, Cau Giay, Hanoi, Vietnam.

<sup>e</sup>Graduate University of Science and Technology (GUST), Vietnam Academy of Science and Technology (VAST),  
18 Hoang Quoc Viet, Cau Giay, Hanoi, Vietnam.

---

\*Corresponding Author. Tel.: + (66) 2 524 5458. Fax: (+66) 2 524 6200. Email:

[locnguyen@ait.ac.th](mailto:locnguyen@ait.ac.th)

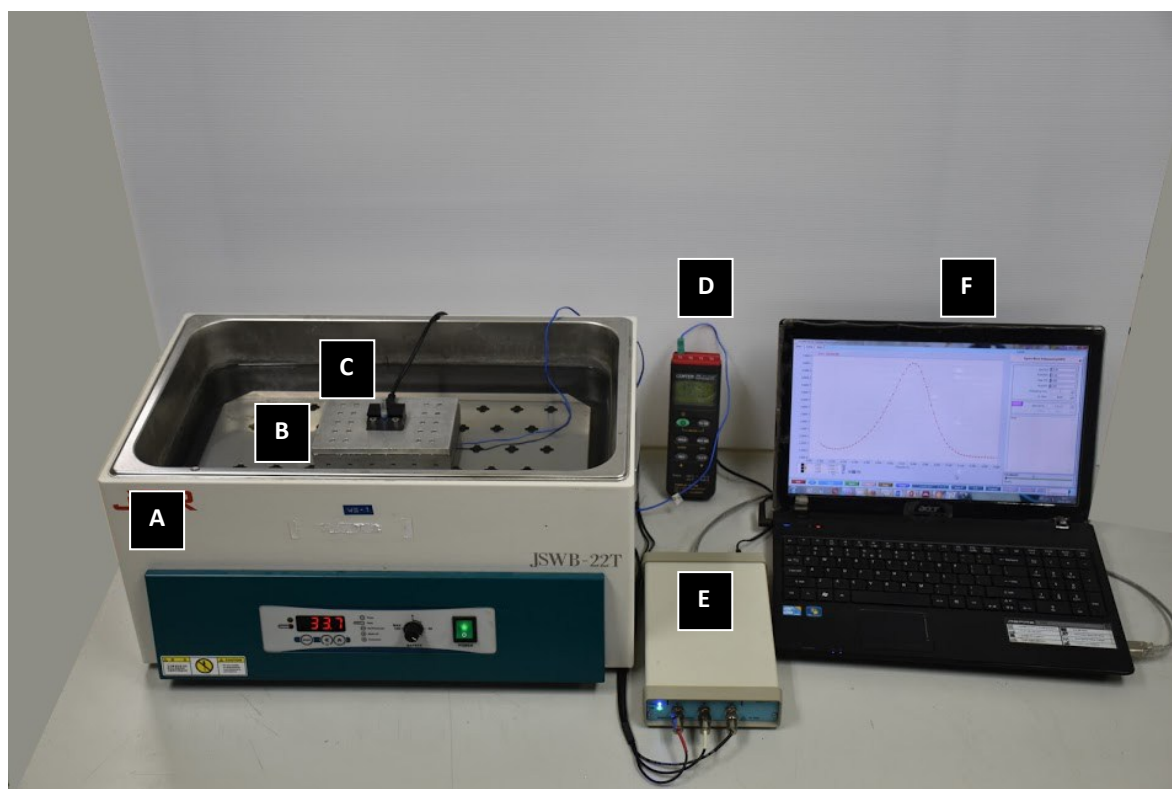

Figure S1. Experimental set-up used for the amplification of HBV DNA with real time electrochemical monitoring. A) Water bath; B) Heating block; C) Drop cell connector; D) Data logger; E) Potentiostat; F) Computer.

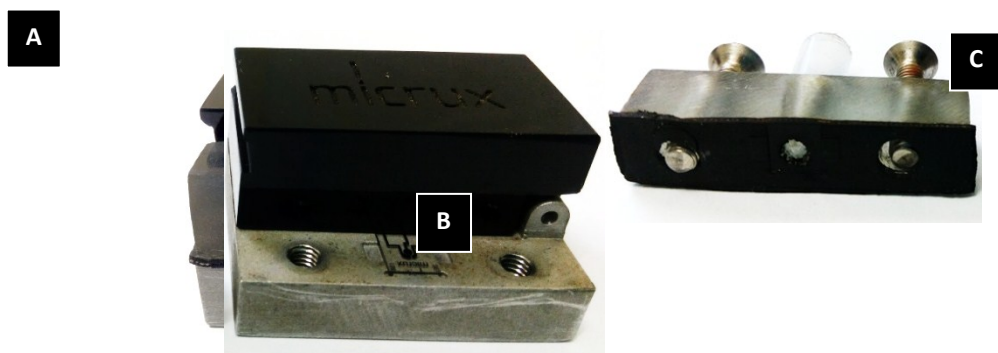

Figure S2. Modified electrochemical drop cell. A) Reaction chamber; B) Thin film electrode; C) Custom-made fixture

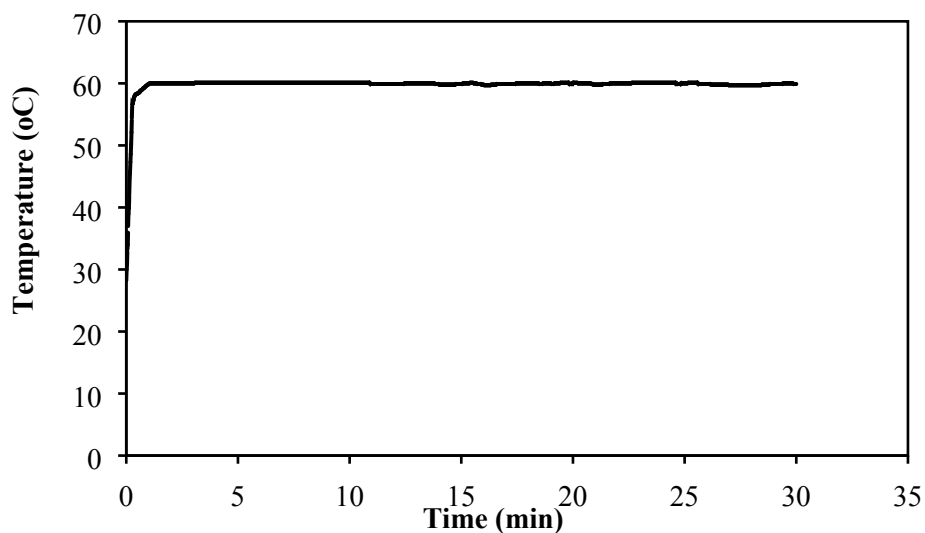

Figure S3. Temperature of the liquid inside the reaction chamber.

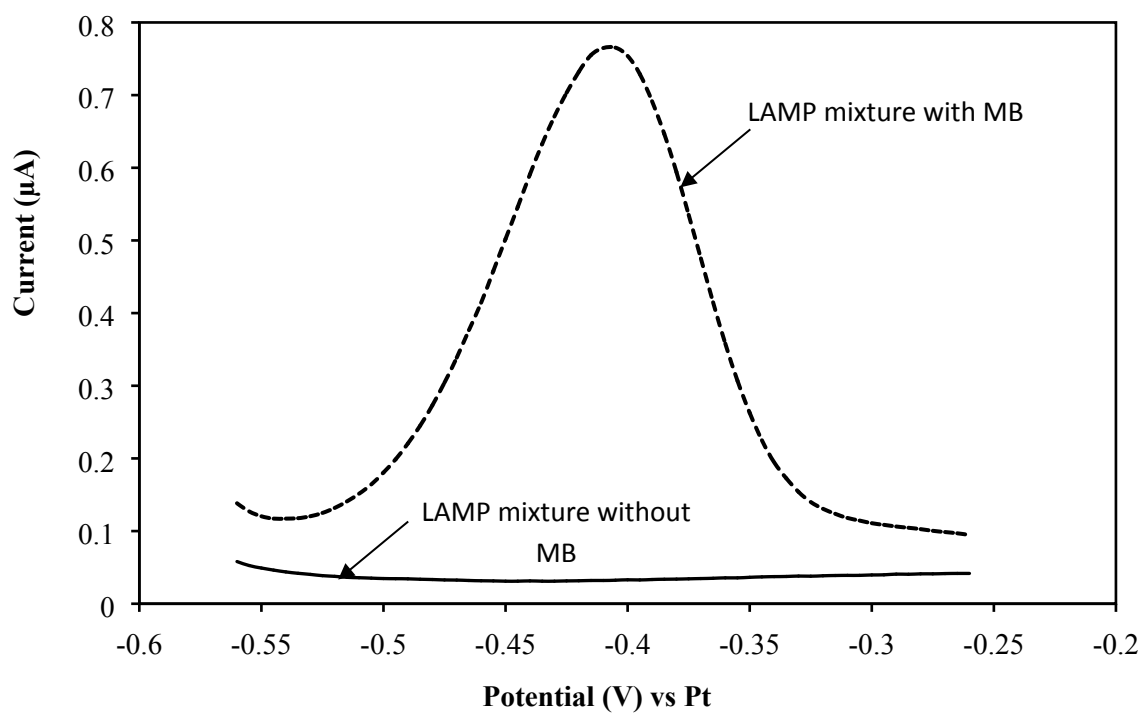

Figure S4. SWV response of MB (25  $\mu\text{M}$ ) in LAMP reaction mixture. SWV was measured at 63°C with frequency of 5 Hz, amplitude of 5 mV, step potential of 5 mV, and potential range from -0.56 to -0.26.
